# Supplementary material for: Significance of training, monitoring and assessment of malaria workers in achieving malaria elimination goal of Malaria Elimination Demonstration Project
Source: Springer Nature journal article supplement (doi:10.1186/s12936-020-03534-9), 2021-01-07
Supplement: MOESM2 [file 18747862]

## Foundation for Disease Elimination and Control of India (FDEC-I)

## Mandla- Malaria Elimination Demonstration Project, (M-MEDP)

## Madhya Pradesh

## Malaria Field Coordinator (MFC) checklist for Village Malaria Worker (VMW)

Date: DD/MM/YY Block ..... Cluster..... Name of MFC .....

|       | Name of employee | Employee ID | Name of visited village with code |
|-------|------------------|-------------|-----------------------------------|
| VMW1  |                  |             |                                   |
| VMW 2 |                  |             |                                   |
| VMW 3 |                  |             |                                   |

| Checklist points                                                                                                                                 |                                                                                                                                                      | VMW 1                | VMW 2                | VMW 3                |
|--------------------------------------------------------------------------------------------------------------------------------------------------|------------------------------------------------------------------------------------------------------------------------------------------------------|----------------------|----------------------|----------------------|
| 1                                                                                                                                                | Was s/he found as per micro tour plan assigned                                                                                                       | (YES/NO)             | (YES/NO)             | (YES/NO)             |
| 2                                                                                                                                                | Does s/he know the procedure of RDT conduction & interpretation                                                                                      | (YES/NO)             | (YES/NO)             | (YES/NO)             |
| 3                                                                                                                                                | Does s/he know to administer anti-malarial doses (ask few random question)                                                                           | (YES/NO)             | (YES/NO)             | (YES/NO)             |
| 4                                                                                                                                                | When did VMW submit the DAR in mobile app (last working day report) mention date                                                                     | (YES/NO)             | (YES/NO)             | (YES/NO)             |
| 5                                                                                                                                                | Did he know how to read and use the expiry date on logistics?                                                                                        | (YES/NO)             | (YES/NO)             | (YES/NO)             |
| 6                                                                                                                                                | Write the code number of last blood sample collected on filter paper and glass slide                                                                 | (NUMBER)             | (NUMBER)             | (NUMBER)             |
| 7                                                                                                                                                | No. of visits made last week/ last month to supervise the work of VMW by the following:                                                              | -                    | -                    | -                    |
|                                                                                                                                                  | • GoMP (mention name and designation of official here: _____)                                                                                        | (NUMBER)             | (NUMBER)             | (NUMBER)             |
|                                                                                                                                                  | • FDEC India (mention name and designation of official here: _____)                                                                                  | (NUMBER)             | (NUMBER)             | (NUMBER)             |
|                                                                                                                                                  | • MFC (mention name here: _____)                                                                                                                     | (NUMBER)             | (NUMBER)             | (NUMBER)             |
| 8                                                                                                                                                | Does the VMW have adequate stock of commodities & drugs (RDT, ACT, CQ,PQ, Filter paper etc.)                                                         | (YES/NO)             | (YES/NO)             | (YES/NO)             |
| 9                                                                                                                                                | Are there any drugs at risk of expiry with in next 3 months (physically verify). If yes, mention here:                                               | (If yes, mention/NO) | (If yes, mention/NO) | (If yes, mention/NO) |
| 10                                                                                                                                               | Are RDT kits and logistics being stored as per guidelines laid down by FDEC India?                                                                   | (YES/NO)             | (YES/NO)             | (YES/NO)             |
| 11                                                                                                                                               | No. of patient refer to health facility by VMW in last week/month for non-malarial patient                                                           | (YES/NO)             | (YES/NO)             | (YES/NO)             |
| 12                                                                                                                                               | No. of patient refer to health facility by VMW in last week/month for malaria positive patient                                                       | (YES/NO)             | (YES/NO)             | (YES/NO)             |
| 13                                                                                                                                               | Is VMW involved in source reduction for larval control or minor engineering                                                                          | (YES/NO)             | (YES/NO)             | (YES/NO)             |
| 14                                                                                                                                               | Is VMW actively involved with village health and sanitation committee                                                                                | (YES/NO)             | (YES/NO)             | (YES/NO)             |
| 15                                                                                                                                               | Is VMW engaging regularly with ASHA, ANM, Panchayat and local leaders? Cross check with partners.                                                    | (YES/NO)             | (YES/NO)             | (YES/NO)             |
| 16                                                                                                                                               | Was the VMW following dress code (ID card, formals, blue apron, bag, groomed) – Give 1 mark for each                                                 | /5                   | /5                   | /5                   |
| 17                                                                                                                                               | Check VMW's bag – Is he carrying any non-project supplies? (Exempt – Lunch box, water bottle etc.) If yes, mention here:                             | (YES/NO)             | (YES/NO)             | (YES/NO)             |
| <b>Interview of randomly selected fever cases tested/treated by VMW in the last visit at this village. Mention date of last visit : DD/MM/YY</b> |                                                                                                                                                      |                      |                      |                      |
| 18                                                                                                                                               | Did VMW test the patient by RDT                                                                                                                      | (YES/NO)             | (YES/NO)             | (YES/NO)             |
| 19                                                                                                                                               | What was time difference between test done and treatment start (mention in minutes /hours)                                                           | (NUMBER)             | (NUMBER)             | (NUMBER)             |
| 20                                                                                                                                               | Was any drug given to the malaria negative patient? If yes, which and how much?                                                                      | (YES/NO)             | (YES/NO)             | (YES/NO)             |
| 21                                                                                                                                               | Was money charged for the test/treatment                                                                                                             | (YES/NO)             | (YES/NO)             | (YES/NO)             |
| 22                                                                                                                                               | How would you rate the VMW on his behavior: (1 being the worst and 5 being excellent) (Was he soft spoken? Did he take your consent before testing?) | /5                   | /5                   | /5                   |
| <b>Fact and figures</b>                                                                                                                          |                                                                                                                                                      |                      |                      |                      |
| 23                                                                                                                                               | Total number of fever cases tracked by VMW in the last 4 weeks/one month                                                                             | (NUMBER)             | (NUMBER)             | (NUMBER)             |
| 24                                                                                                                                               | No. of malaria positive cases (PF+PV+MIX=Total cases) during this week, month and year                                                               | Wk/Mo/Yr             | Wk/Mo/Yr             | Wk/Mo/Yr             |
| 25                                                                                                                                               | No. of cases undergoing / completed radical treatment during this week, month and year                                                               | Wk/Mo/Yr             | Wk/Mo/Yr             | Wk/Mo/Yr             |
| 26                                                                                                                                               | No. of live birth/ death in village during this week, month and year                                                                                 | Wk/Mo/Yr             | Wk/Mo/Yr             | Wk/Mo/Yr             |
| 27                                                                                                                                               | No. of call attended from fever patient in the past week                                                                                             | (NUMBER)             | (NUMBER)             | (NUMBER)             |
| 28                                                                                                                                               | No. of household survey conducted (Count households)                                                                                                 | (NUMBER)             | (NUMBER)             | (NUMBER)             |
| 29                                                                                                                                               | No. of LLIN verified during his/her visit during this week, month and year                                                                           | Wk/Mo/Yr             | Wk/Mo/Yr             | Wk/Mo/Yr             |
| 30                                                                                                                                               | No. of times participated in IEC/ BCC camp this week, month and year (School + Haat bazaar)                                                          | Wk/Mo/Yr             | Wk/Mo/Yr             | Wk/Mo/Yr             |

Additional observations: .....

.....

Name and Signature of MFC
